# Supplementary material for: Trends in psychological distress in Great Britain, 1991–2019: evidence from three representative surveys
Source: PubMed Central journal article supplement — J Epidemiol Community Health. 2023 May 15;77(7):468–73. doi: 10.1136/jech-2022-219660 (PMC10313989; doi:10.1136/jech-2022-219660), 2023-05-15

## Supplement 2

**Figure S2.1 – Female trends in psychological distress in GB, Scotland and England, 1991-2019 (Sources: Understanding Society, Scottish Health Survey, Health Survey for England)**

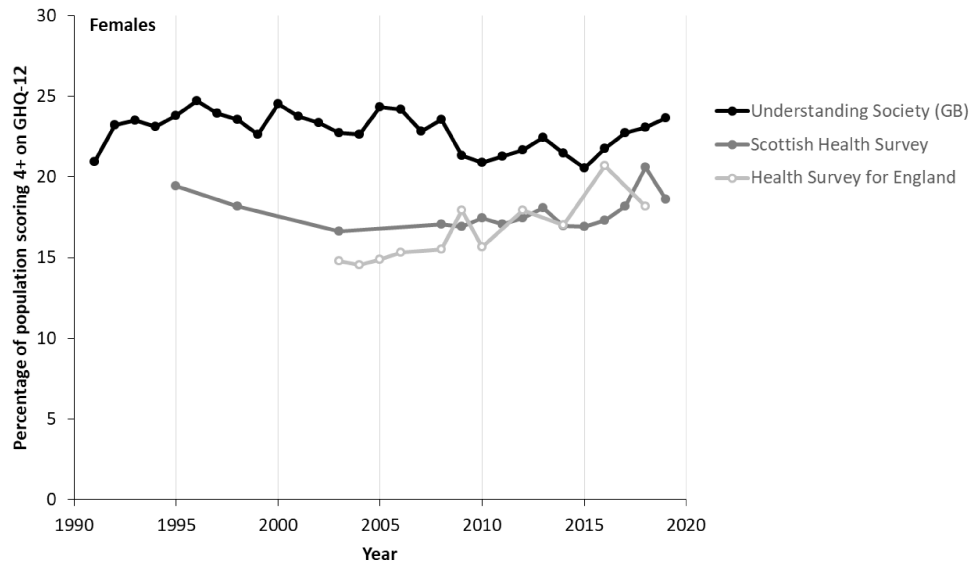

**Figure S2.2 – Male trends in psychological distress in GB, Scotland and England, 1991-2019 (Sources: Understanding Society, Scottish Health Survey, Health Survey for England)**

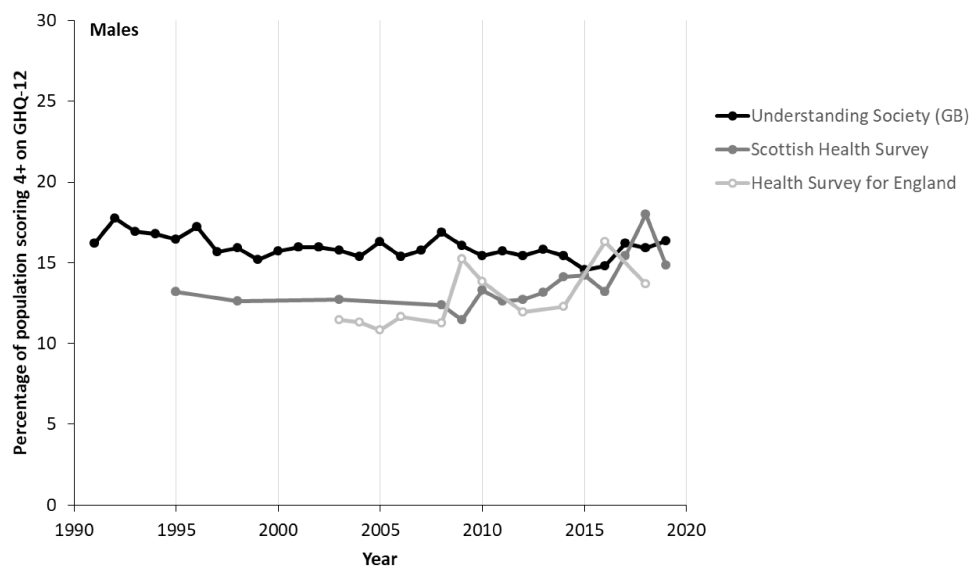

**Figure S2.3 – Trends in area deprivation-based inequalities in psychological distress in GB, measured using the Slope Index of Inequality (SII) and Relative Index of Inequality (RII), 1991-2019 (Source: Understanding Society)**

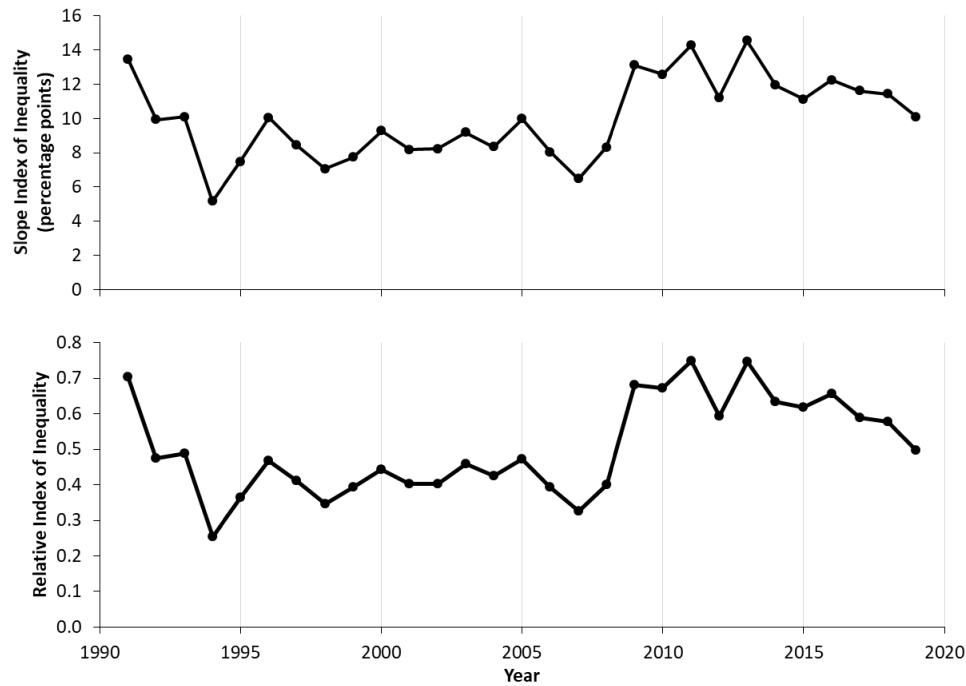

**Figure S2.4 – Trends in area deprivation-based inequalities in psychological distress in Scotland, measured using the Slope Index of Inequality (SII) and Relative Index of Inequality (RII), 1991-2019 (Source: Scottish Health Survey)**

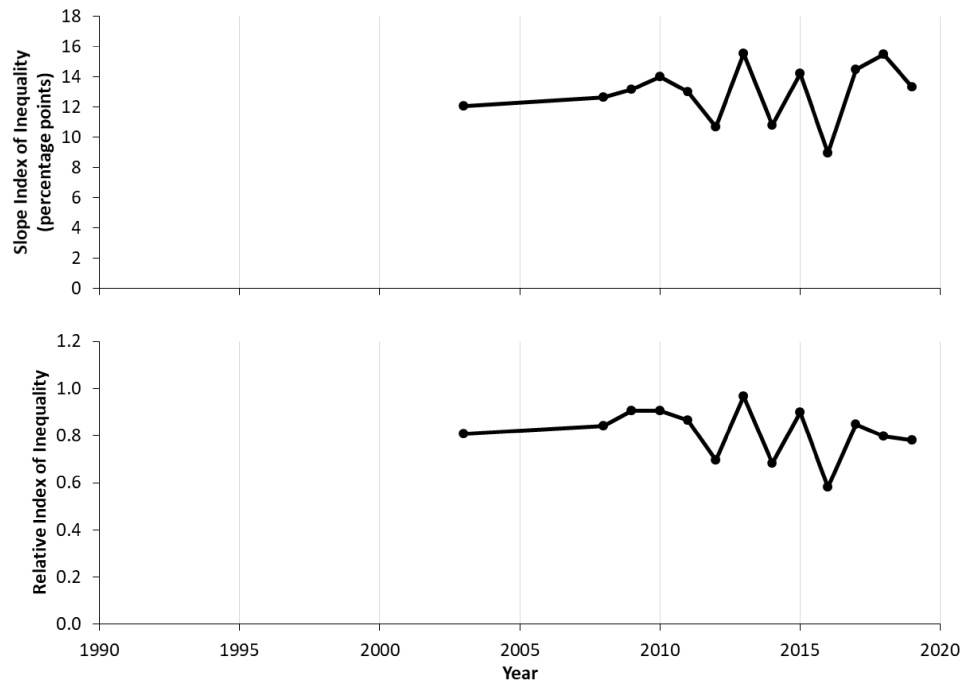

**Figure S2.5 – Trends in area deprivation-based inequalities in psychological distress in England, measured using the Slope Index of Inequality (SII) and Relative Index of Inequality (RII), 1991-2019 (Source: Health Survey for England)**

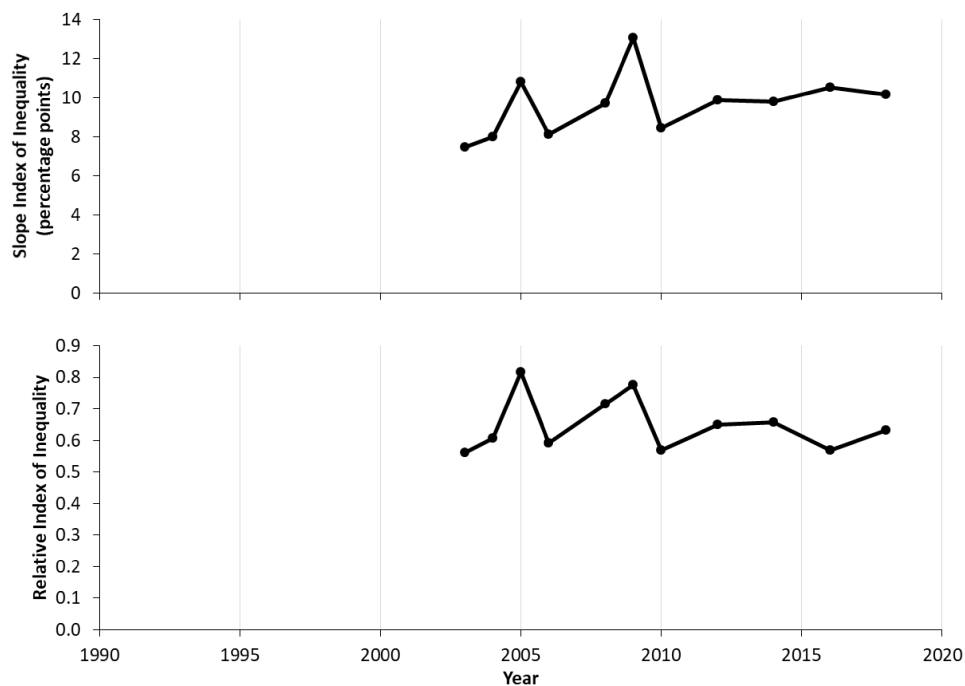

**Figure S2.6 – Trends in area deprivation-based inequalities in psychological distress in GB, males, 1991-2019 (Sources: Understanding Society, Scottish Health Survey, Health Survey for England)**

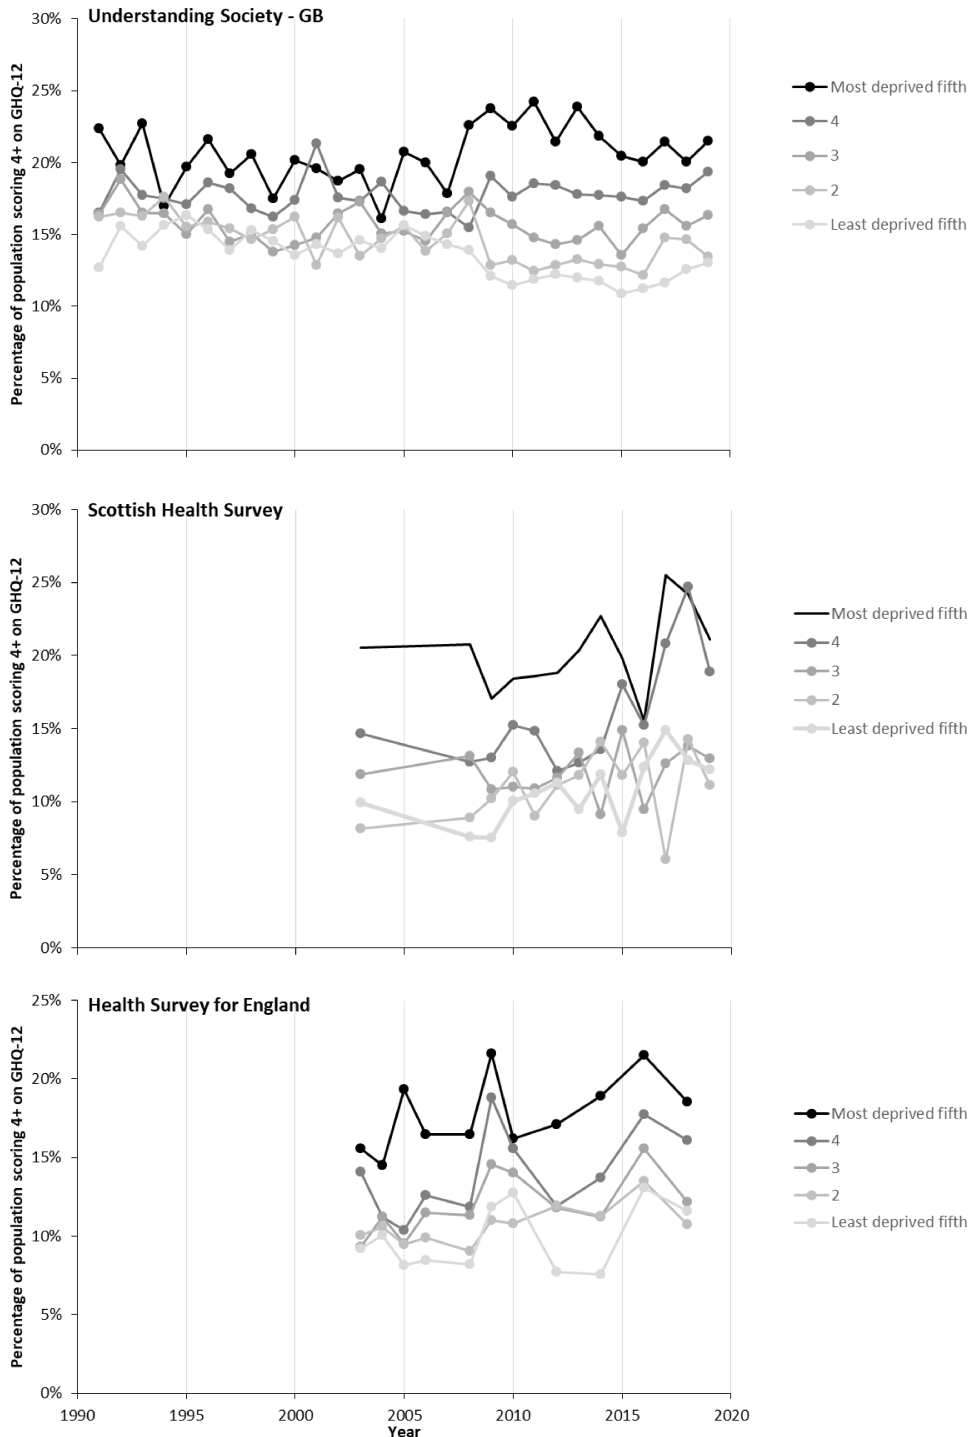

**Figure S2.7 – Trends in area deprivation-based inequalities in psychological distress in GB, females, 1991-2019 (Sources: Understanding Society, Scottish Health Survey, Health Survey for England)**

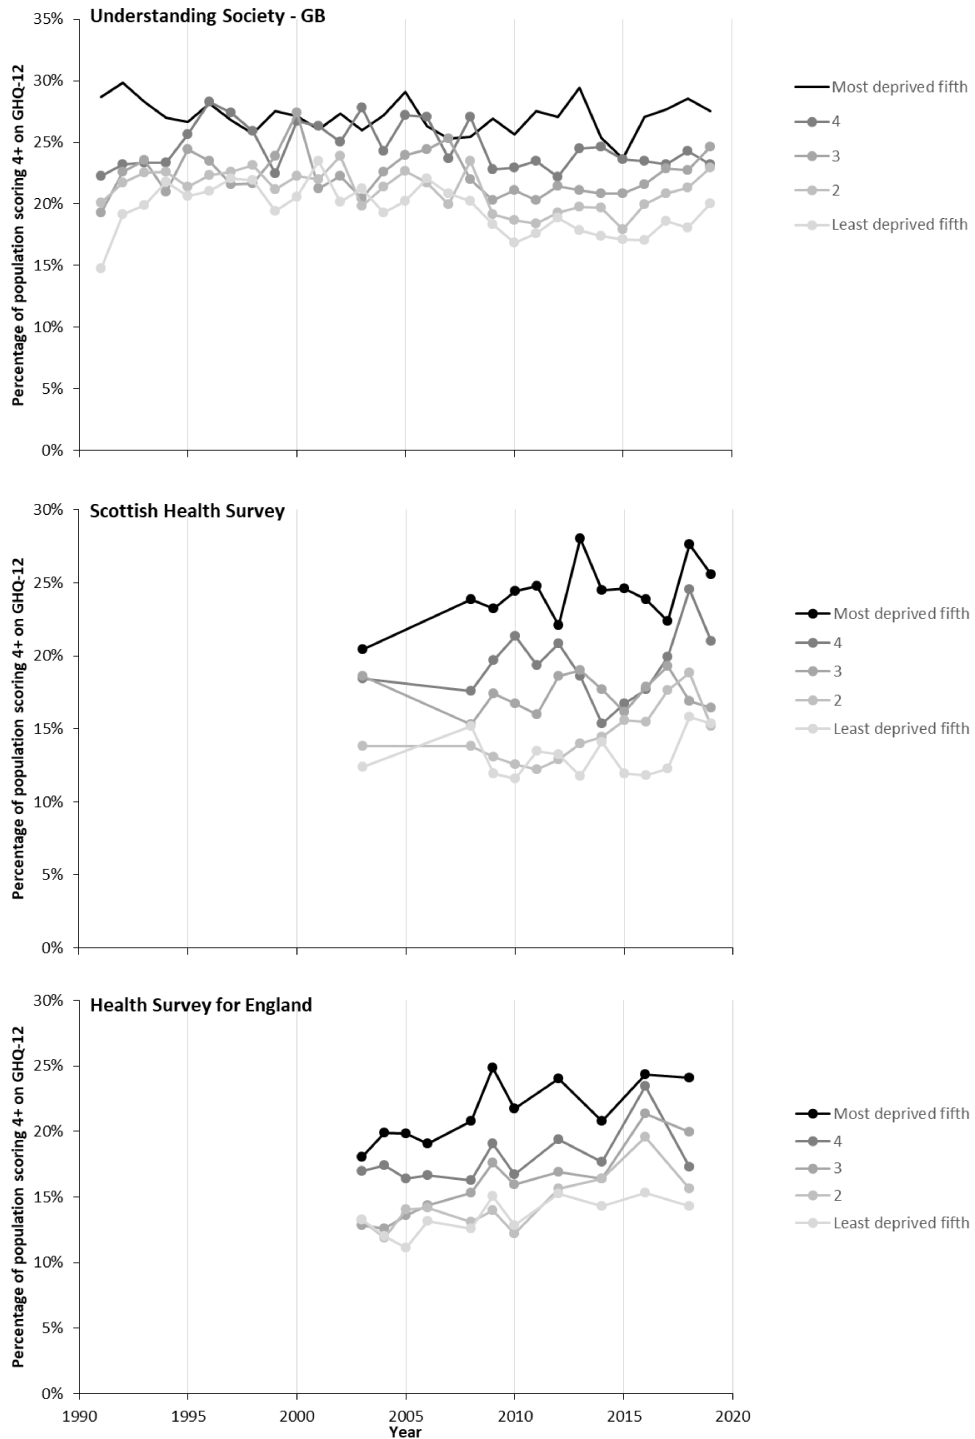

**Figure S2.8 – Trends in area deprivation-based inequalities in psychological distress in GB, males and females combined, 16-34 year olds, 1991-2019 (Sources: Understanding Society, Scottish Health Survey, Health Survey for England)**

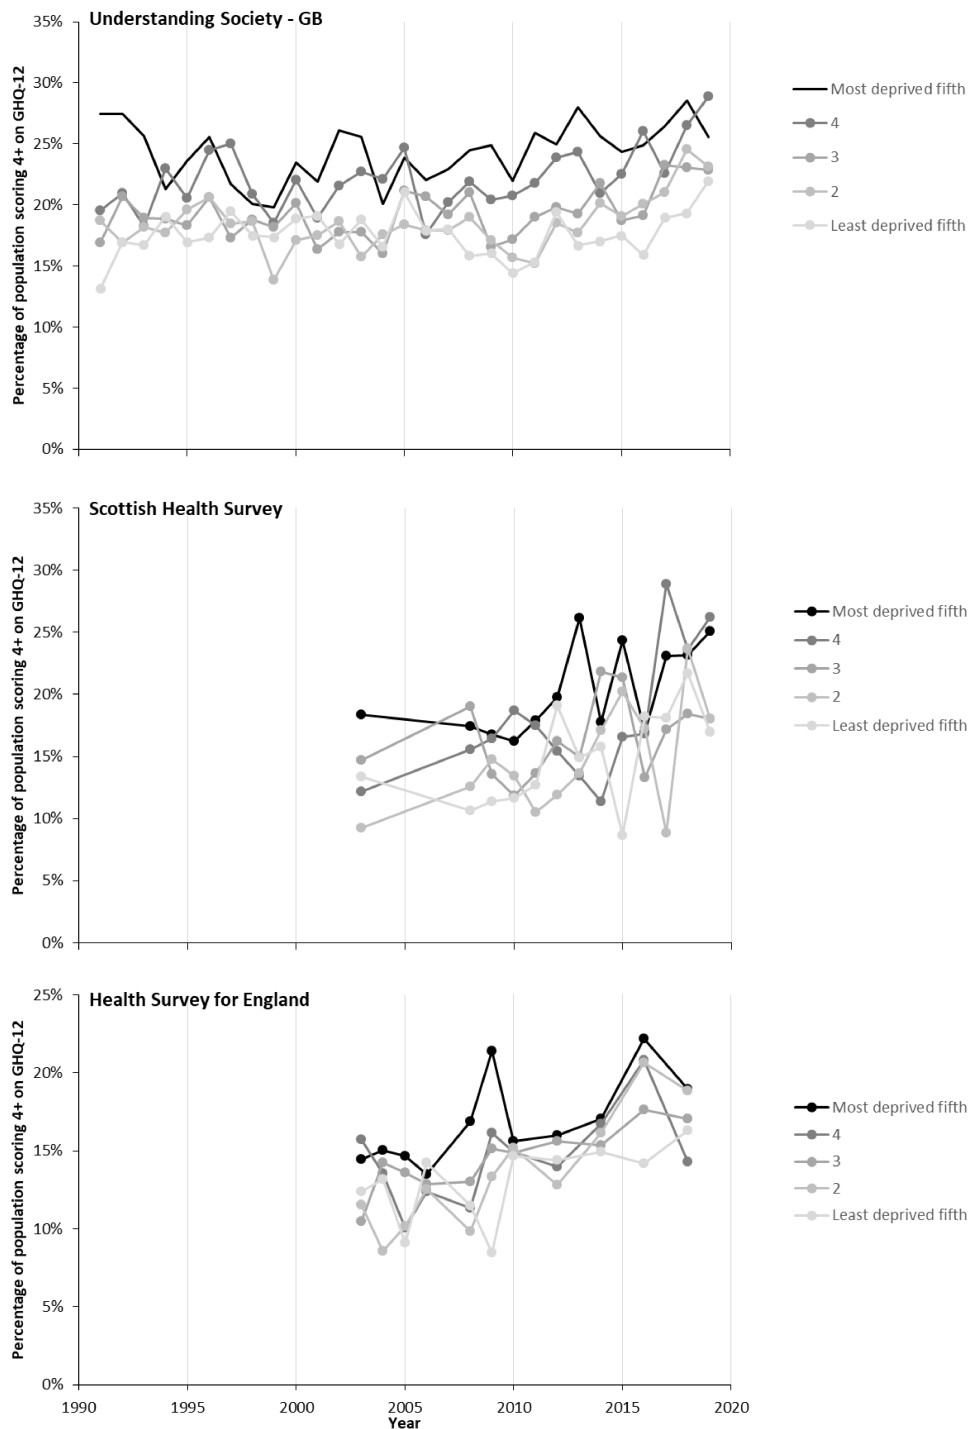

**Figure S2.9 – Trends in area deprivation-based inequalities in psychological distress in GB, males and females combined, 35-64 year olds, 1991-2019 (Sources: Understanding Society, Scottish Health Survey, Health Survey for England)**

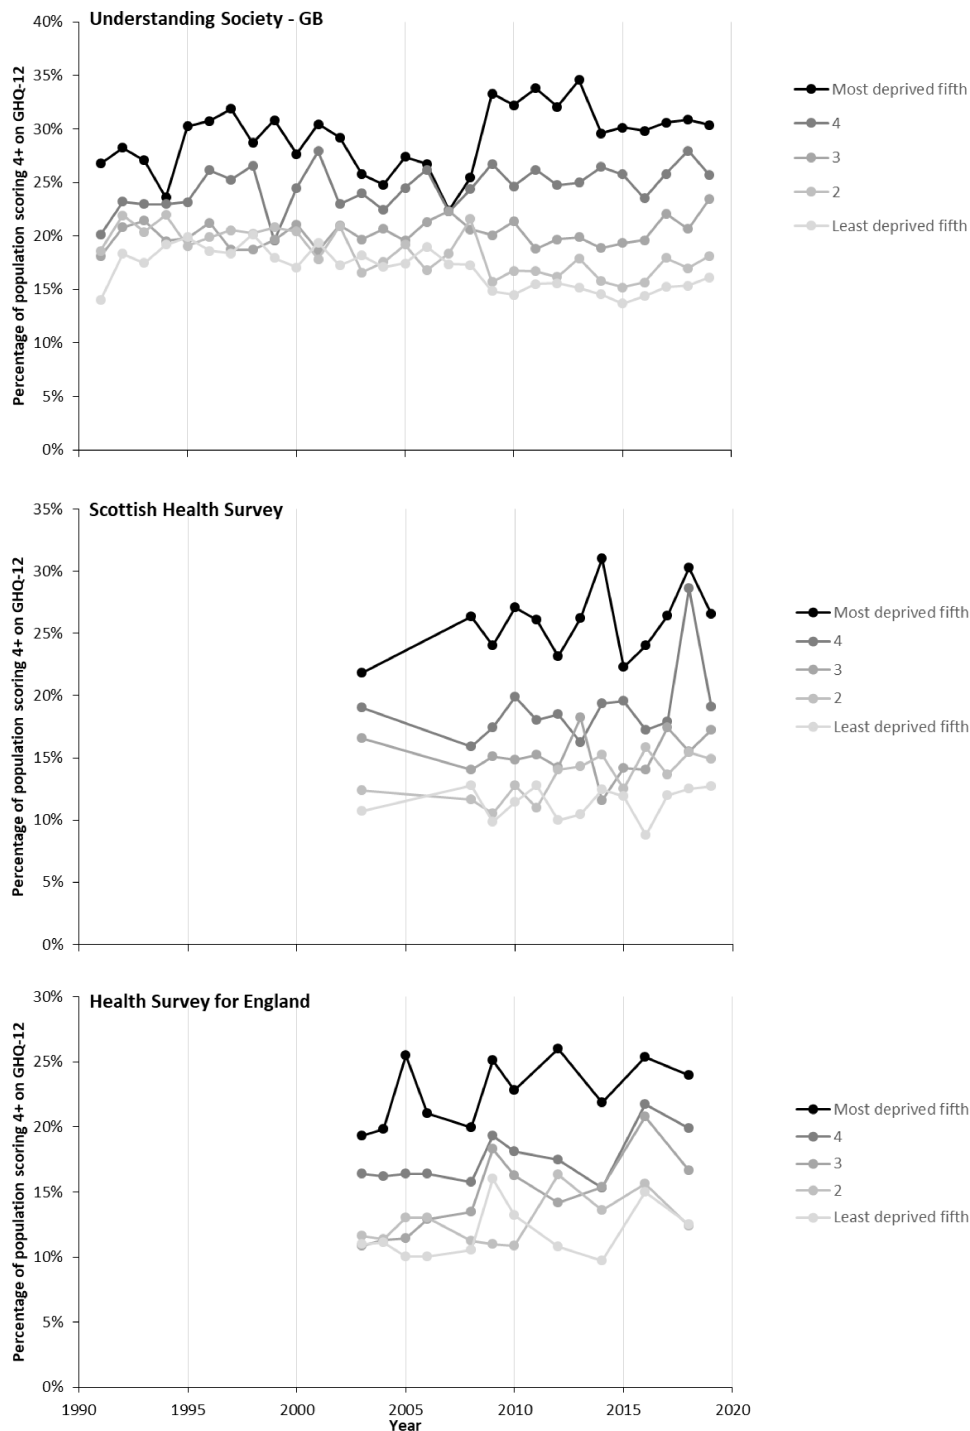



**Figure S2.10 – Trends in area deprivation-based inequalities in psychological distress in GB, males and females combined, 65+ year olds, 1991-2019 (Sources: Understanding Society, Scottish Health Survey, Health Survey for England)**

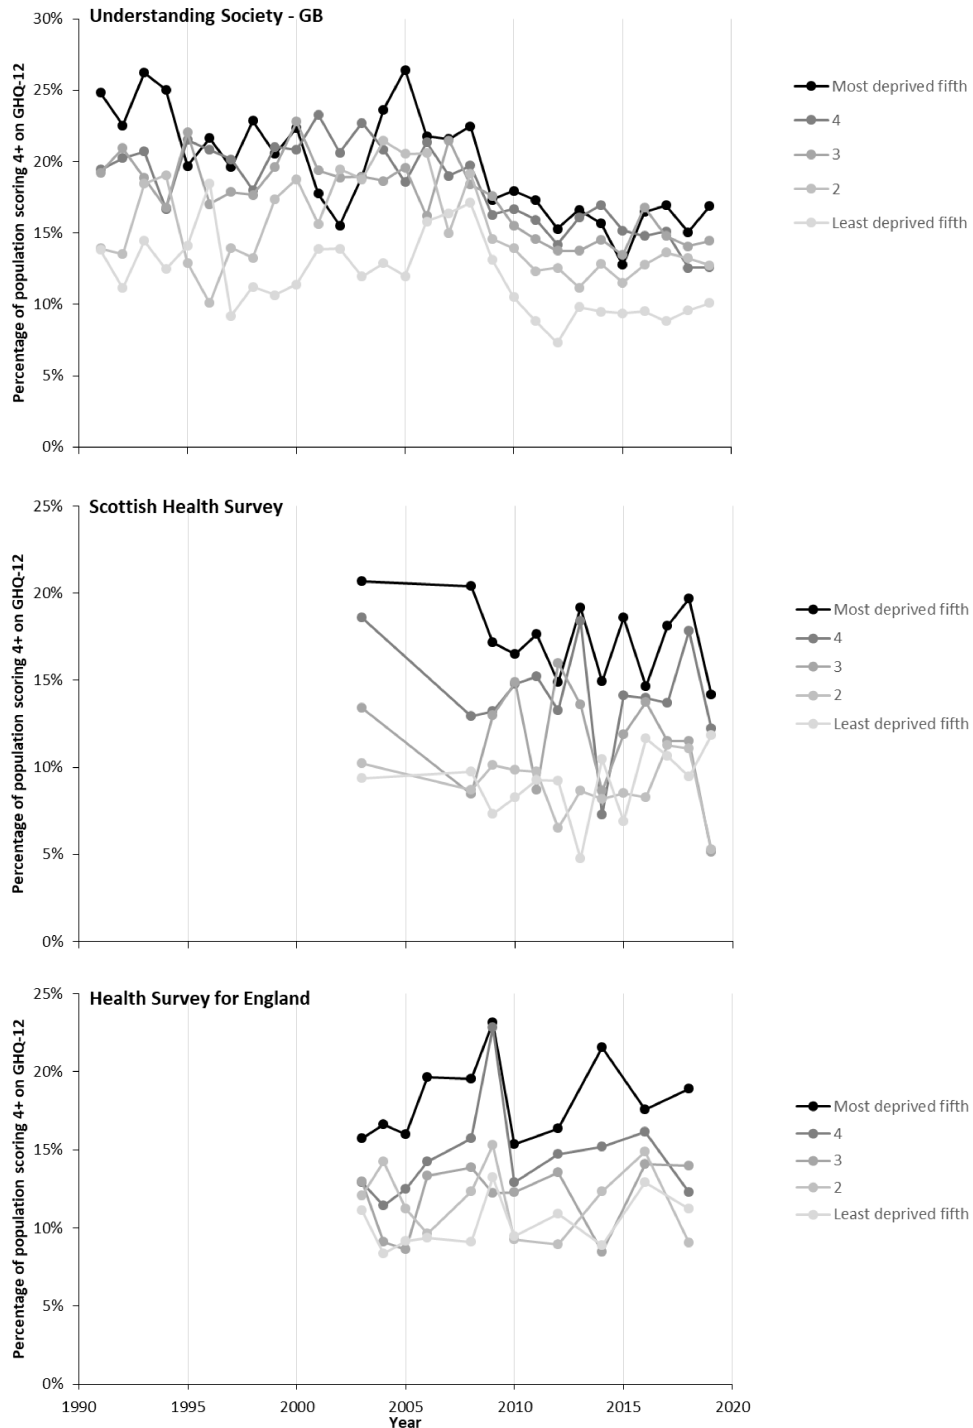

Figure S2.11 – Trends and turning points (between 2010-2019) in the trends in prevalence of psychological distress for the total population, 1991-2019  
(Sources: Understanding Society, Scottish Health Survey, Health Survey for England)

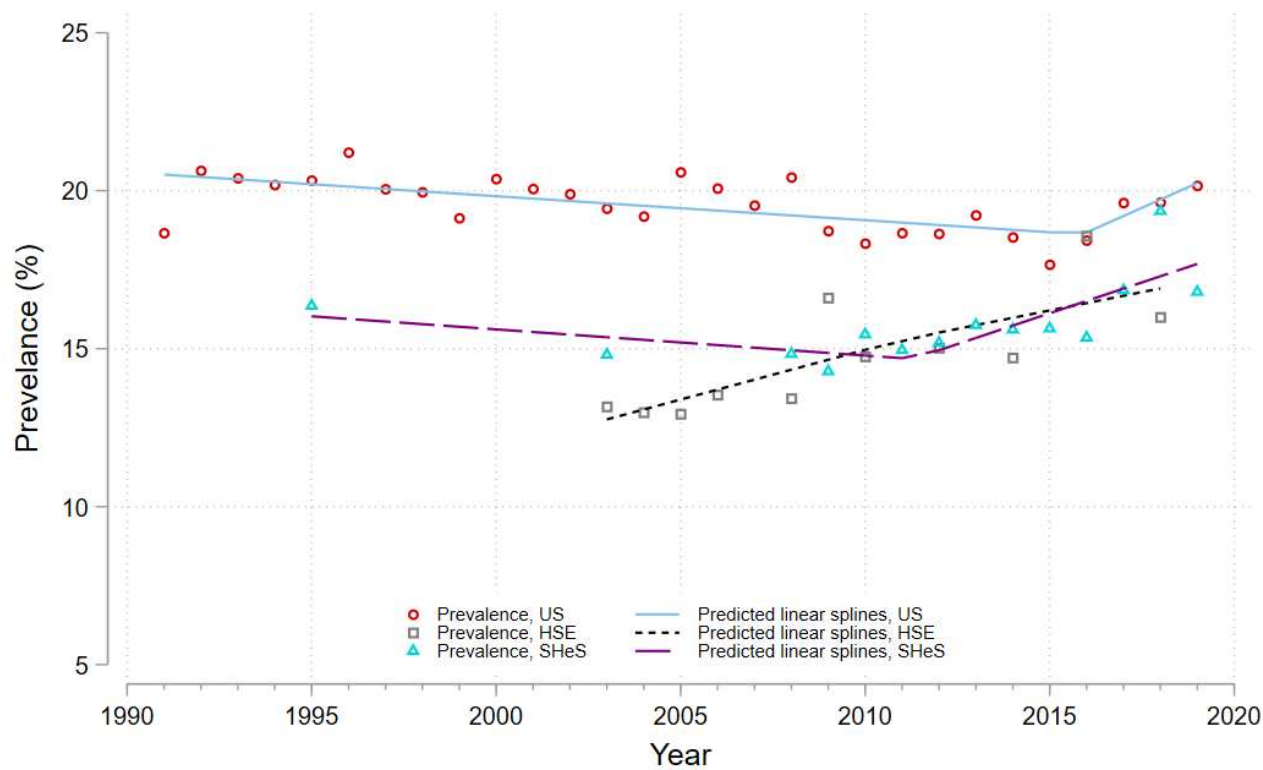

Figure S2.12 – Trends and turning points (between 2010-2019) in the trends in prevalence of psychological distress by sex, 1991-2019 (Sources: Understanding Society, Scottish Health Survey, Health Survey for England)

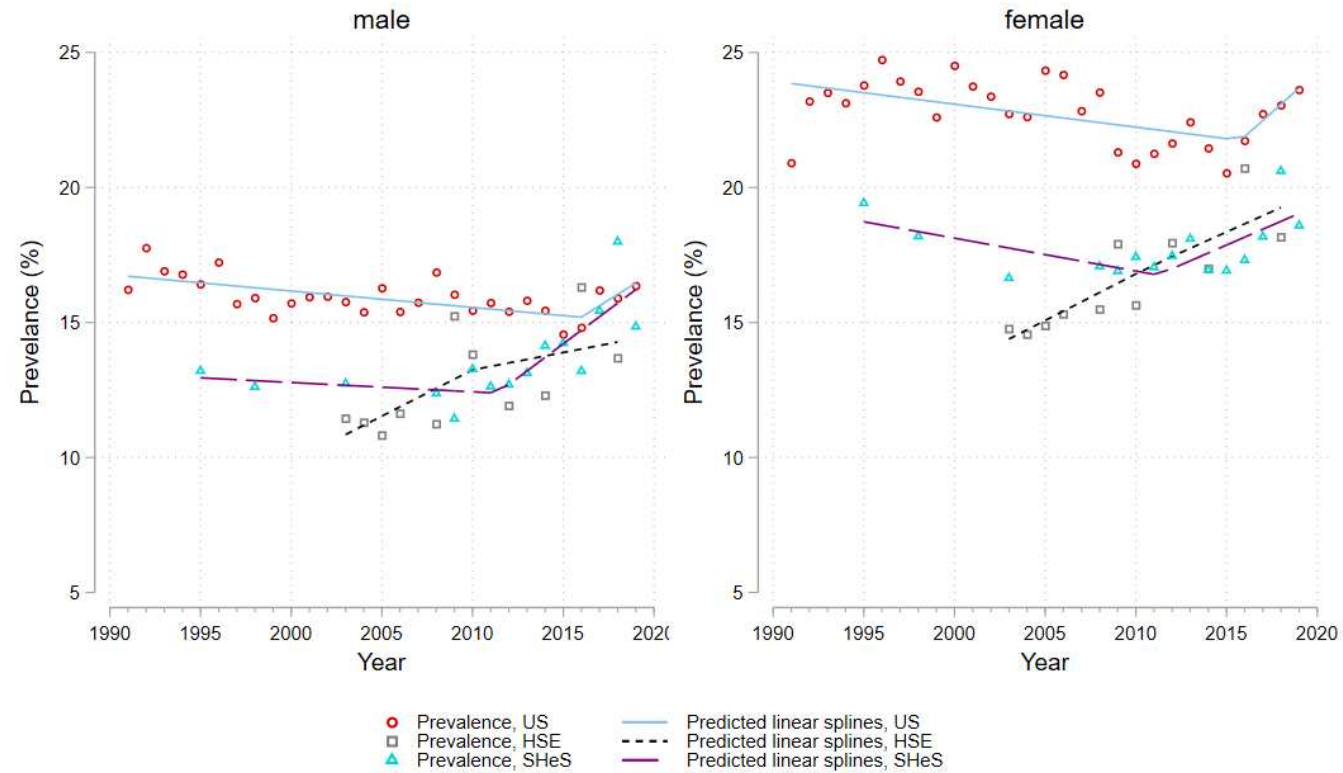

**Figure S2.13 – Trends and turning points (between 2010-2019) in the trends in prevalence of psychological distress by age strata, 1991-2019 (Sources: Understanding Society, Scottish Health Survey, Health Survey for England)**

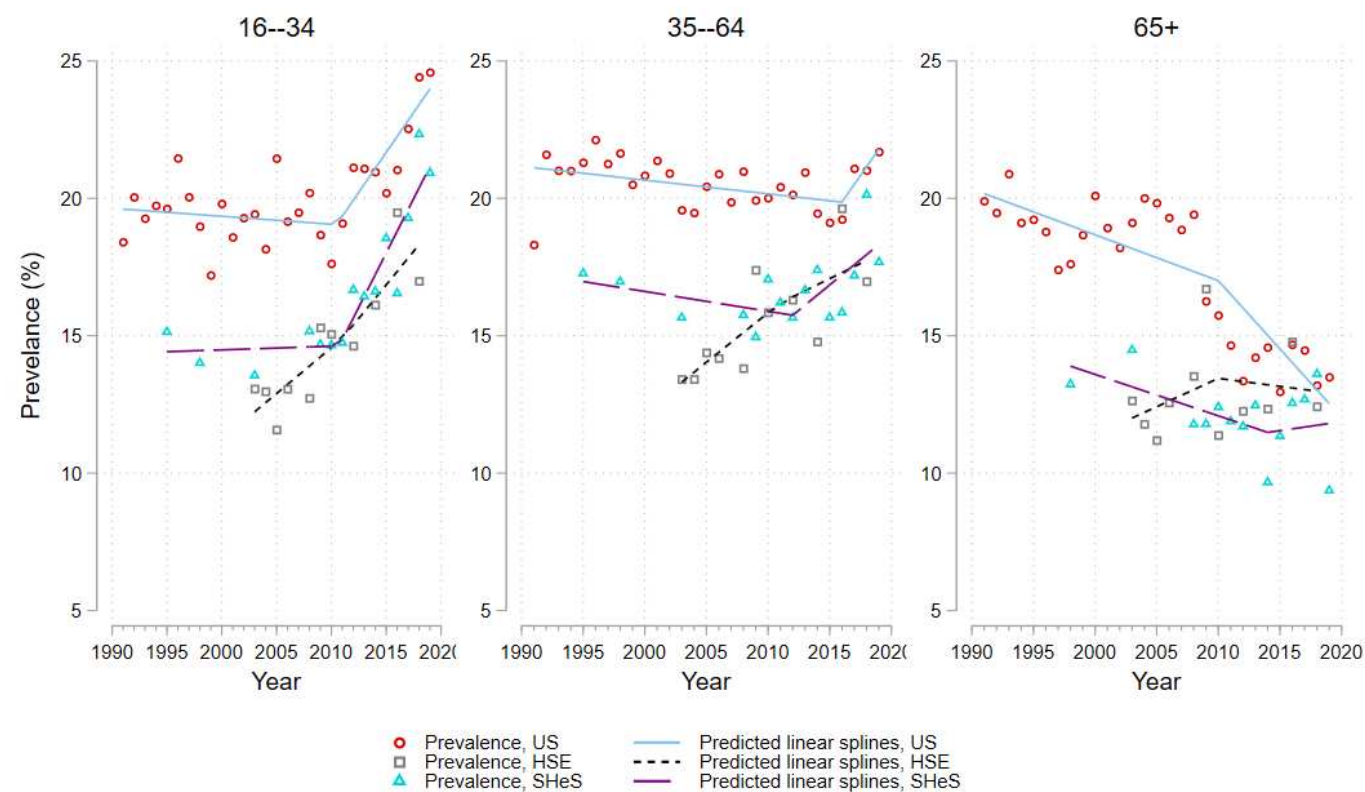

**Figure S2.14 – Trends and turning points (between 2010-2019) in the trends in prevalence of psychological distress by deprivation strata, 1991-2019**  
 (Sources: Understanding Society, Scottish Health Survey, Health Survey for England)

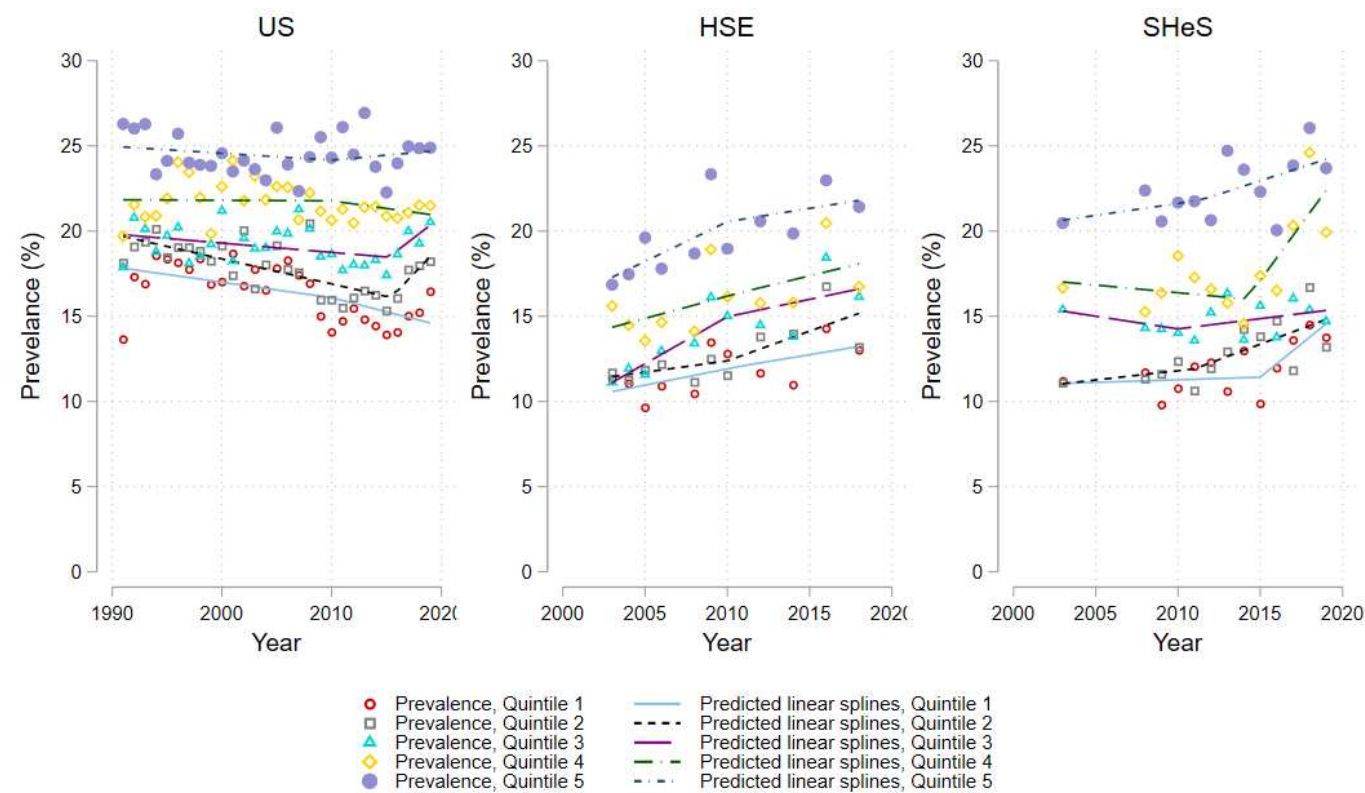

Supplement: jech-2022-219660supp002.pdf [file jech-2022-219660supp002.pdf]
